# Supplementary material for: Enhanced performance in hybrid perovskite solar cell by modification with spinel lithium titanate
Source: Royal Society of Chemistry journal article supplement (doi:10.1039/c4ta05762g), 2015-01-01
Supplement: c4ta05762g1.pdf [file c4ta05762g1.pdf]

## Supporting Information

### Enhanced performance in hybrid perovskite solar cell by modification with spinel lithium titanate

Jiangwei Li, Wenzhe Li, Haopeng Dong, Nan Li, Xudong Guo, Liduo Wang\*

5 Key Lab of Organic Optoelectronics and Molecular Engineering of Ministry of Education,

Department of Chemistry, Tsinghua University, Beijing, P.R.China.

\*To whom correspondence should be addressed: chldwang@mail.tsinghua.edu.cn

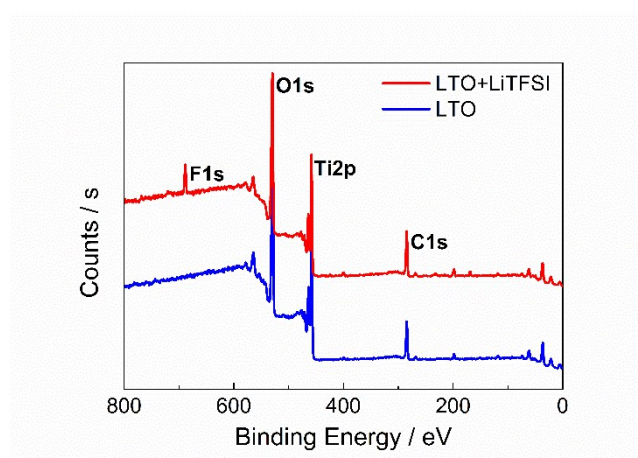

10 **Figure S1.** Overall XPS results of LTO after reaction with LiTFSI in HMT solution. The labelled F 1s peak is indicative of adsorbed TFSI<sup>-</sup> on the surface of reacted LTO.

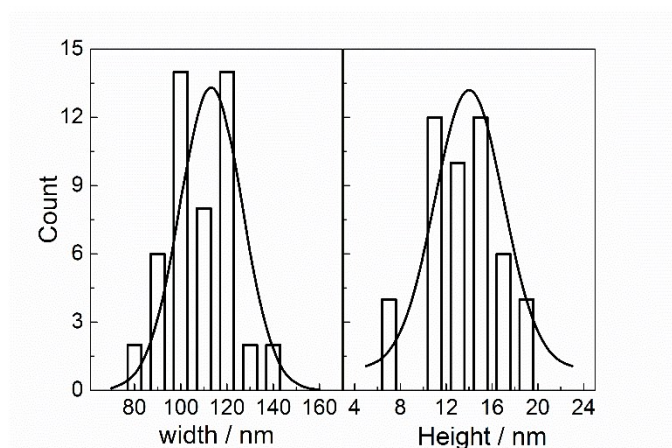

15 **Figure S2.** Size distributions of width and height of LTO nanosheets deposited on silicon substrate obtained from AFM measurements.

**Table S1** Molar ratio of Ti/Li and corresponding Li composition in LTO and the reacted LTO derived from ICP-OES results

| Samples                                        | LTO   | LTO + LiTFSI |
|------------------------------------------------|-------|--------------|
| Ti/Li                                          | 0.823 | 0.833        |
| x in $\text{Li}_{4+x}\text{Ti}_5\text{O}_{12}$ | 0.12  | 0.18         |

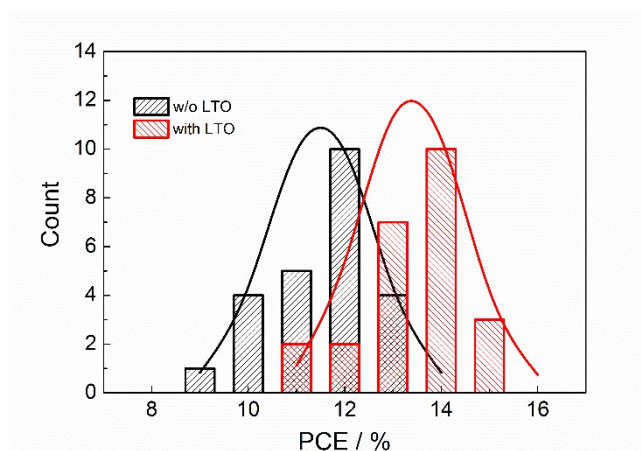

**Figure S3.** Histogram of conversion efficiencies for 24 samples of devices with (red) and without (black) LTO modification. With optimized concentration of LTO solution settled, the compact  $\text{TiO}_2$  layer in these devices were 5 prepared with ALD methods as stated in the experiment part.

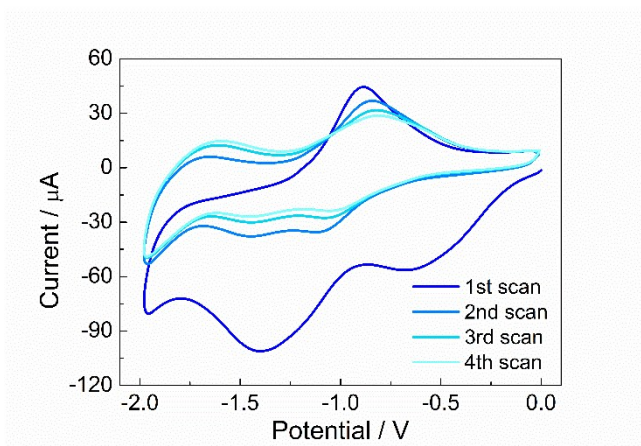

**Figure S4.** First four scans of CVs with LTO working electrode, Pt counter electrode and Ag reference electrode in 0.1M  $\text{LiClO}_4$ /acetonitrile at a scan speed of 50 mV/s.

10

**Table S2** Photovoltaic parameters of devices with LTO and reacted LTO (r-LTO) modification from the same batch

| Samples            | $V_{OC} / \text{V}$ | $J_{SC} / \text{mA} \cdot \text{cm}^{-2}$ | FF   | PCE / % |
|--------------------|---------------------|-------------------------------------------|------|---------|
| Control group      | 0.94                | 20.21                                     | 0.65 | 12.2    |
| LTO modification   | 1.00                | 20.85                                     | 0.72 | 15.0    |
| r-LTO modification | 0.96                | 20.34                                     | 0.71 | 13.9    |
